# Supplementary material for: Multisite synergistic-modulating elementary steps for efficient alkaline hydrogen evolution via NiCu/NiMoOx nanocomposites
Source: Royal Society of Chemistry journal article supplement (doi:10.1039/d3ta03942k), 2023-01-01
Supplement: d3ta03942k1.pdf [file d3ta03942k1.pdf]

## Supporting information

### Multisite synergistic-modulating elementary steps for efficient alkaline hydrogen evolution via NiCu/NiMoO<sub>x</sub> nanocomposites

Haiyao Li<sup>1</sup>, Zhimin Li<sup>2\*</sup>, Zhishan Li<sup>2</sup>, Zhengfu Zhang<sup>1</sup>, Chengping Li<sup>1</sup>, and Jinsong Wang<sup>1\*</sup>

<sup>1</sup>Faculty of Materials Science and Engineering, Kunming University of Science and Technology  
650093 Kunming, P. R. China

<sup>2</sup>Faculty of Metallurgical and Energy Engineering, Kunming University of Science and Technology,  
650093 Kunming, P. R. China

\*Corresponding authors

E-mail addresses: [jswang512@kust.edu.cn](mailto:jswang512@kust.edu.cn) (Jinsong Wang)

[zhimin\\_li015@126.com](mailto:zhimin_li015@126.com) (Zhimin Li)

## Experimental Section

**Electrochemical measurements.** All electrochemical measurements were conducted by CHI760E electrochemical workstation. The samples were employed as the working electrode, a graphite electrode was used as the counter electrode and a saturated Ag/AgCl was utilized as the reference electrode. The electrochemical impedance spectroscopy (EIS) was measured at a voltage of -1.1 V with the frequency range of 100 kHz-0.01 Hz. To evaluate HER activity, the linear sweep voltammetry (LSV) curves were recorded at potential range from -1.0 to -1.5 V vs. Ag/AgCl with a scan rate of 2 mV s<sup>-1</sup>. The potential was converted to reversible hydrogen electrode (RHE) by the equation of  $E_{\text{RHE}} = E_{\text{Ag/AgCl}} + 0.198 + 0.0591 \times \text{pH}$ . The electrochemical active surface area (ECSA) was estimated

according to the double layered capacitance ( $C_{dl}$ ). The cyclic voltammetry (CV) were tested at different scan rates (2 mV s<sup>-1</sup>, 4 mV s<sup>-1</sup>, 6 mV s<sup>-1</sup>, 8 mV s<sup>-1</sup>, and 10 mV s<sup>-1</sup>) in a non-Faradaic region (-0.85 to -0.95V vs. Ag/AgCl), and plotting the difference in current density between the anodic and cathodic sweeps ( $\Delta j = j_a - j_c$ ) at 0.9V vs. Ag/AgCl as a function of scan rates yielded a straight line with slope equal to  $C_{dl}$ .

The ECSA of as-synthesized catalysts is calculated following:

$$ECSA = \frac{C_{dl}(mF \cdot cm^{-2})}{C_s \times uF \cdot cm^{-2} per cm^2_{ECSA}}$$

where the specific capacitance for a flat surface ( $C_s$ ) is generally between 0.02-0.06 mF cm<sup>-2</sup>.

Therefore, we used  $C_s$  of 0.04 mF cm<sup>-2</sup> to calculate the ECSA.

The TOF value is calculated from the equation:

$$TOF = \frac{I}{2 * NF}$$

where  $I$  is the measured current during the linear sweep measurement,  $N$  is number of the active sites, and  $F$  is the Faraday constant (96485 C mol<sup>-1</sup>). Assuming a one electron redox and oxidation process,

the upper limit of active sites could be calculated by the follow equation:  $N = \frac{Q}{2 * F}$ , cyclic voltammetry

were measurements from -0.85 to -0.95 V vs. Ag/AgCl at 2 mV s<sup>-1</sup> in 1 M KOH solution, where  $Q$  is the whole charge of CV curve.

**DFT Calculations.** DFT calculations were performed using the Vienna Ab Initio Simulation Package (VASP).[1-3] The electron ion interaction was described with the projector augmented wave (PAW) method.[4] The electron exchange and correlation energy were treated within the generalized gradient approximation (GGA) in the Perdew-Burke-Ernzerhof formalism (PBE).[5, 6] The energy cut-off for the plane-wave basis was set to 500 eV for all calculations. Conjugated gradient method was used to the geometry optimization and all the atomic coordinates were fully relaxed until the maximal force

on each atom was less than 0.05 eV/Å, and the convergence condition for energy is 10<sup>-4</sup> eV. All constructions possess larger than 20 Å vacuum region in the z direction to minimize the interaction between planes. The Monkhorst Pack [7] sampling scheme were set of 2×2×1 and 4×4×1 for geometry optimization, electronic self-consistent calculation, respectively. The  $\Delta G_H$  is calculated following:

$$\Delta G_H = \Delta E_H + \Delta E_{ZPE} - T\Delta S_H$$

Where  $\Delta E_H$  is the binding energy of hydrogen atom, and  $\Delta E_{ZPE}$  and  $T\Delta S_H$  is zero-point energy corrections and the entropic corrections, respectively, which can be simplified as 0.24 eV.

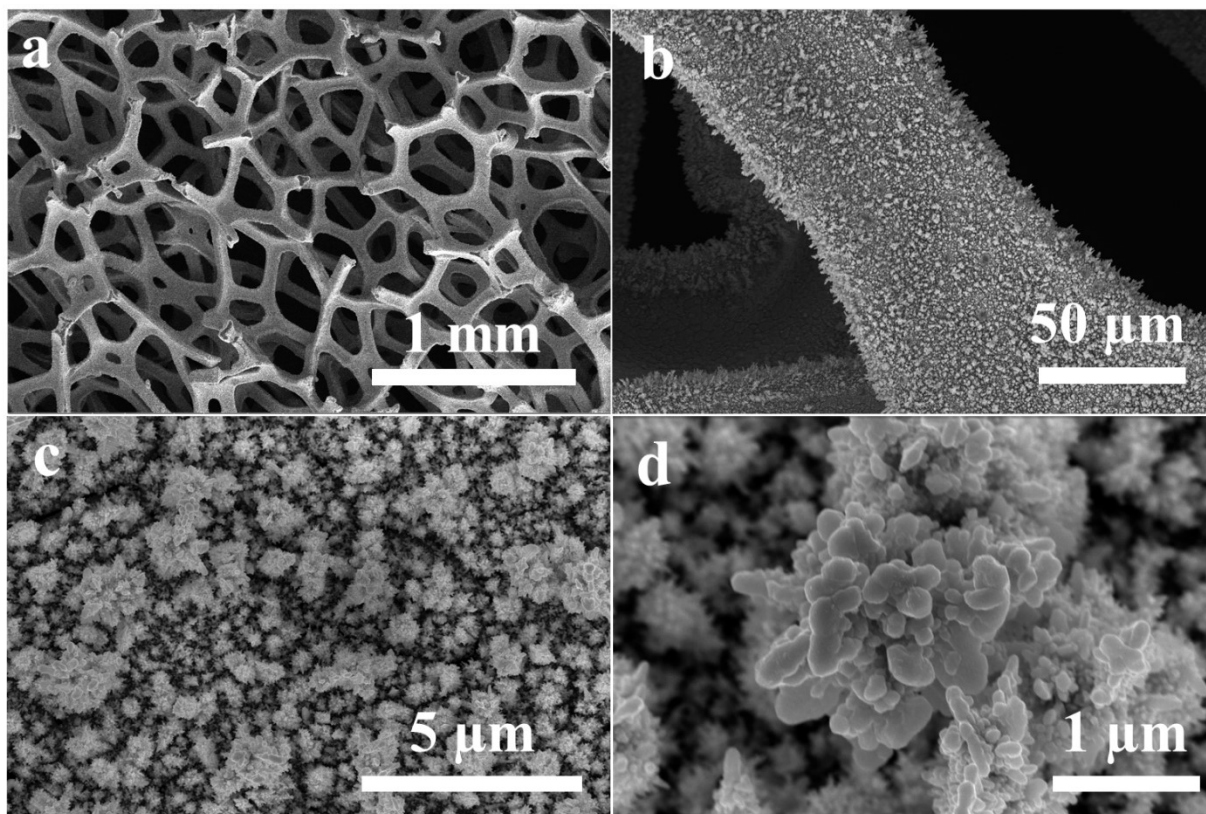

Figure S1. The FE-SEM images of NiCu with different magnifications.

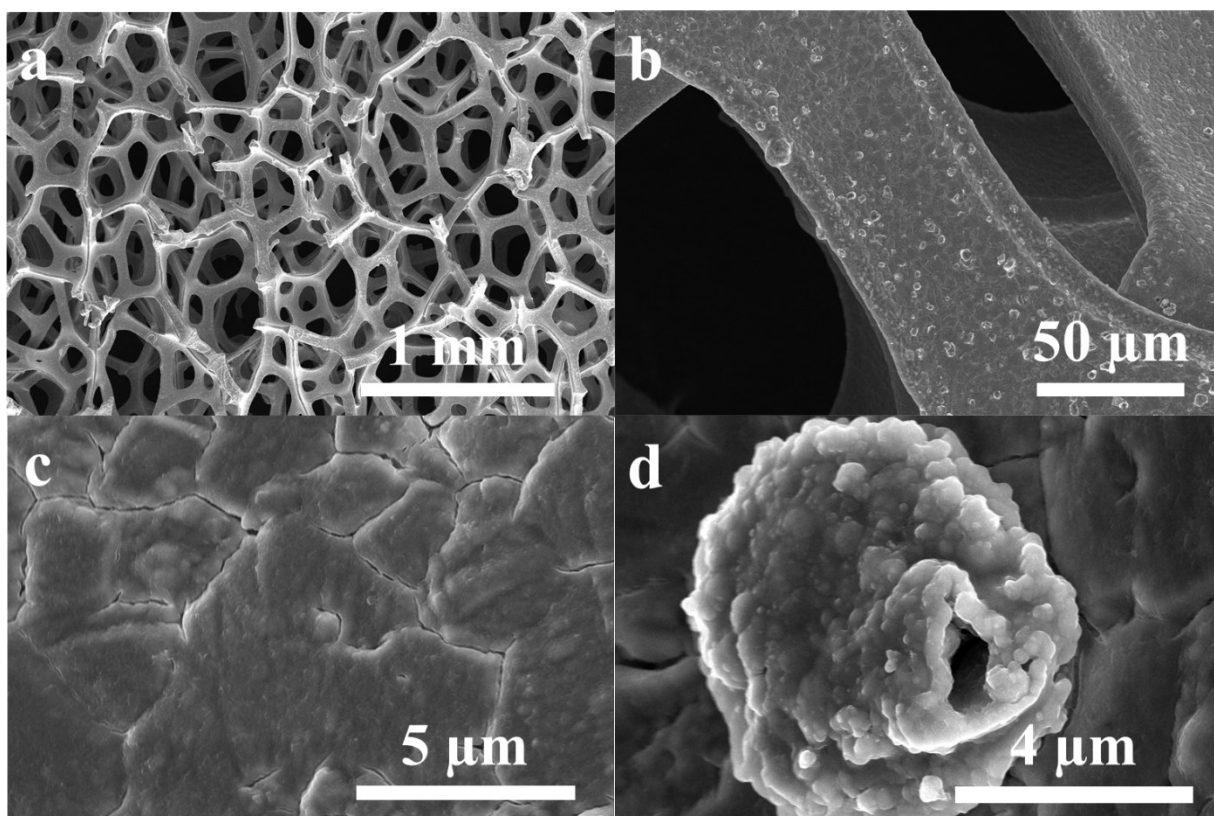

Figure S2. The FE-SEM images of NiMo with different magnifications.

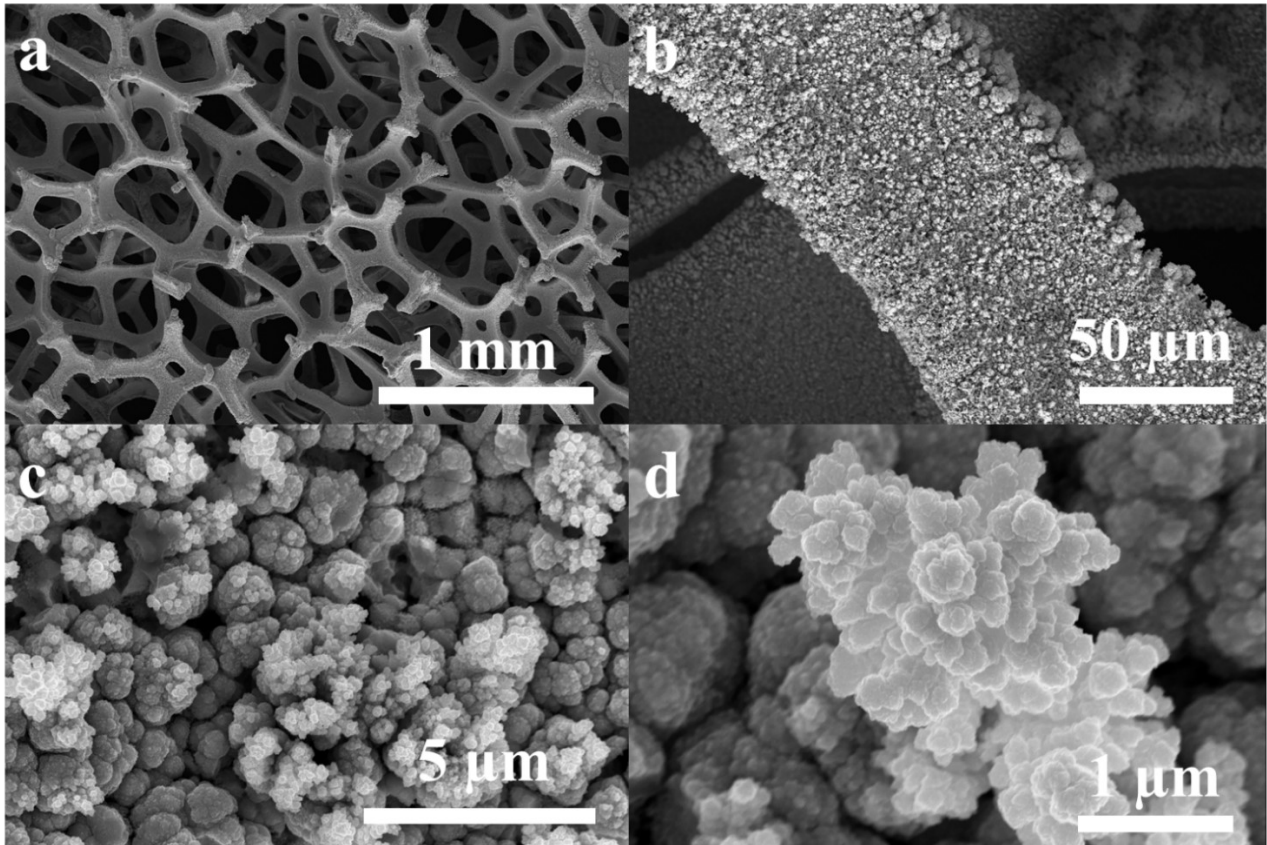

Figure S3. The FE-SEM images of NiCu/MoO<sub>x</sub> with different magnifications.



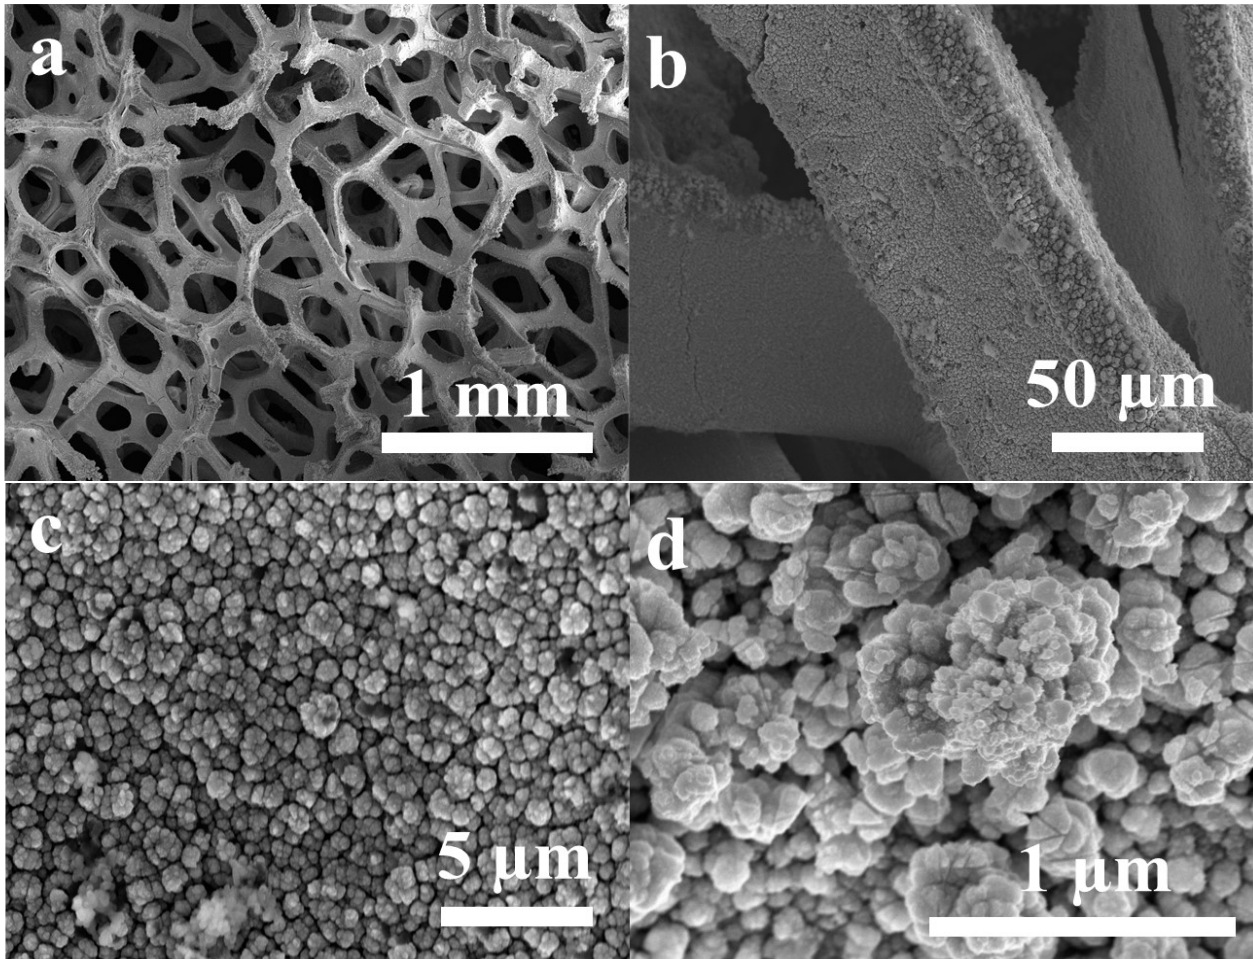

Figure S4. The FE-SEM images of NiCu/MoO<sub>x</sub> after 65 h at 10 mA cm<sup>-2</sup> in 1M KOH.

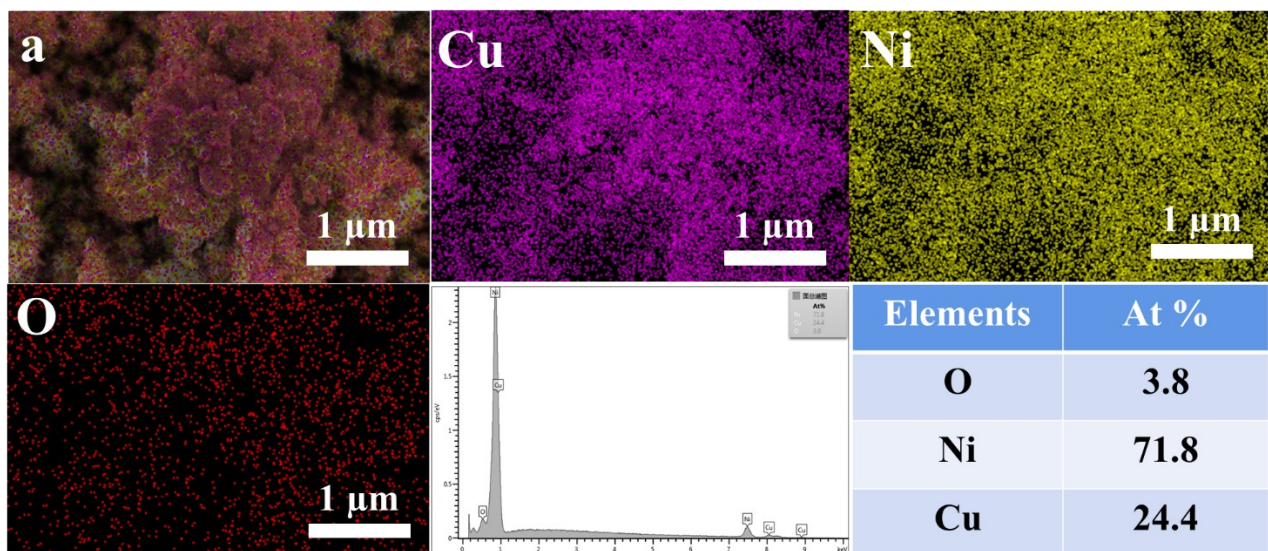

Figure S5. The SEM image of NiCu with EDX elemental mapping and corresponding element amounts.



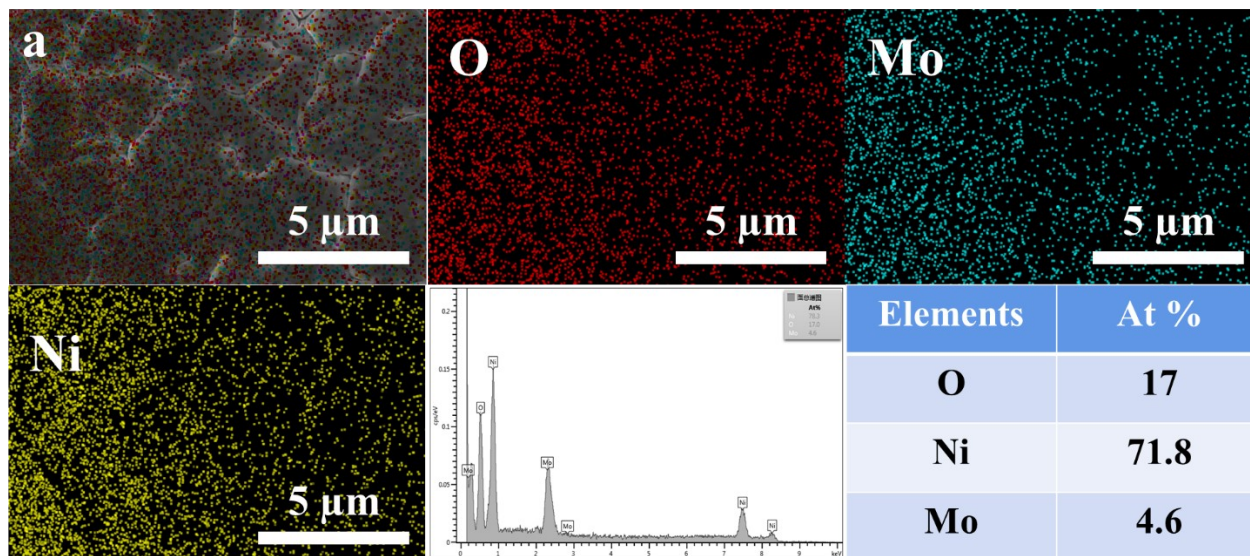

Figure S6. The SEM image of Ni/MoO<sub>x</sub> with EDX elemental mapping and corresponding element amounts.

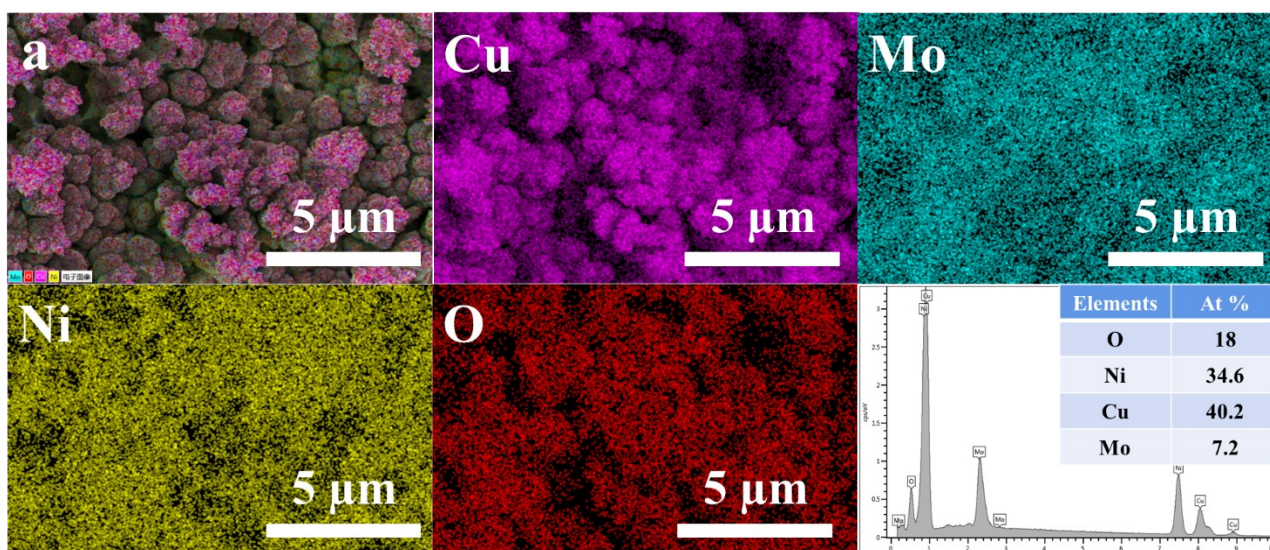

Figure S7. The SEM image of NiCu/MoO<sub>x</sub> with EDX elemental mapping and corresponding element amounts.

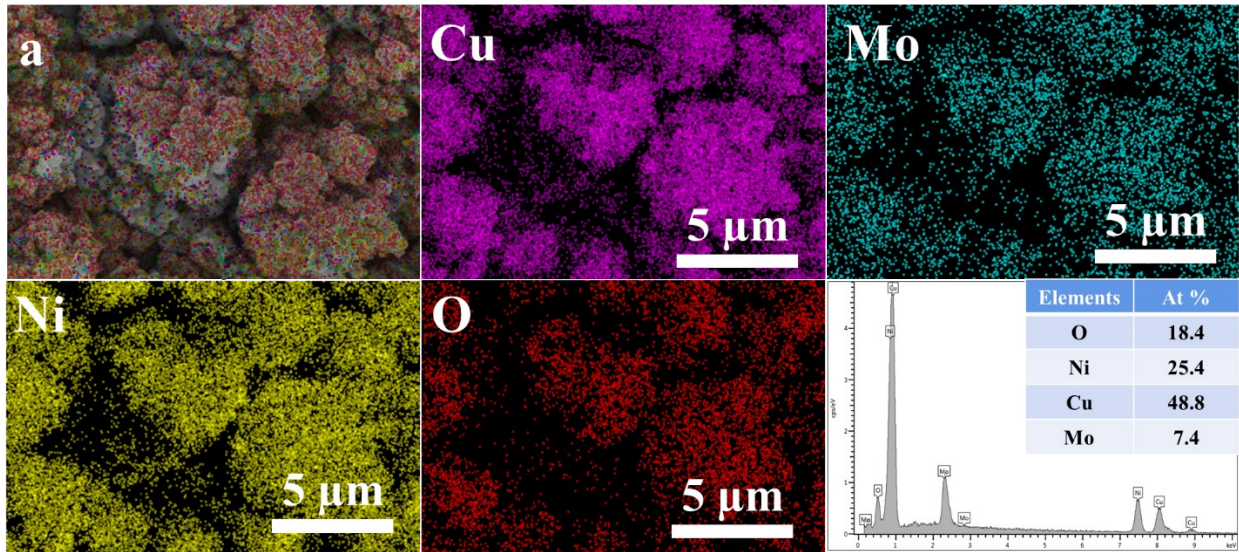

Figure S8. The SEM image with EDX elemental mapping and corresponding element amounts of NiCu/MoO<sub>x</sub> after stability test.

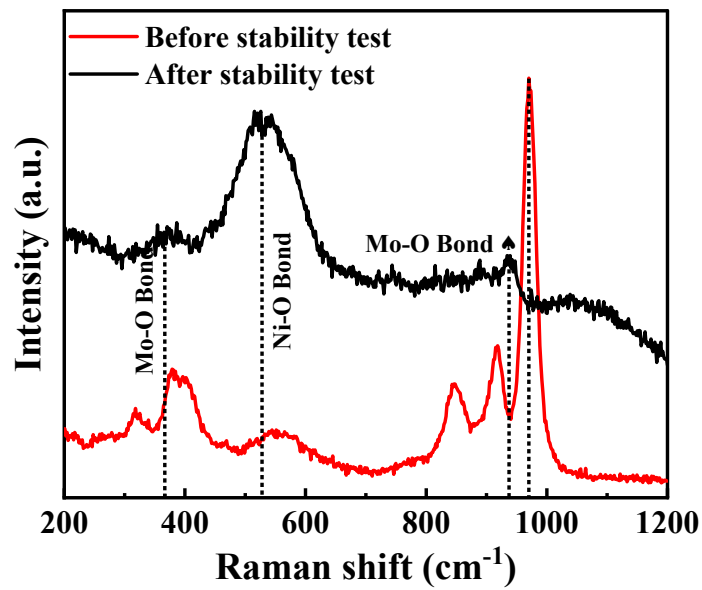

Figure S9. The Raman spectra of NiCu/MoO<sub>x</sub> before and after stability test.



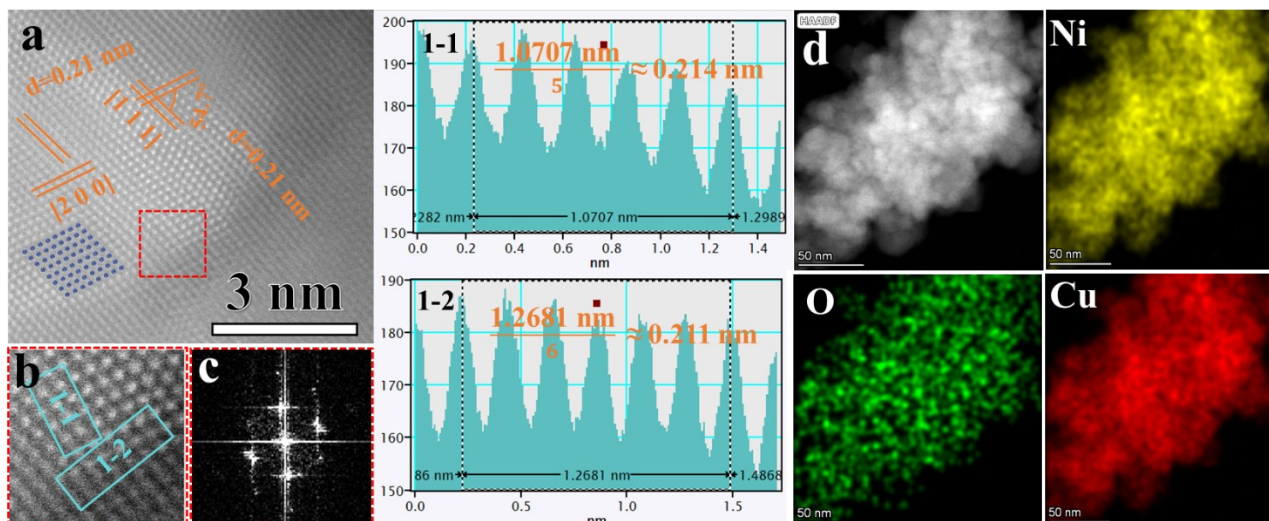

Figure S10. The HAADF-STEM of NiCu.

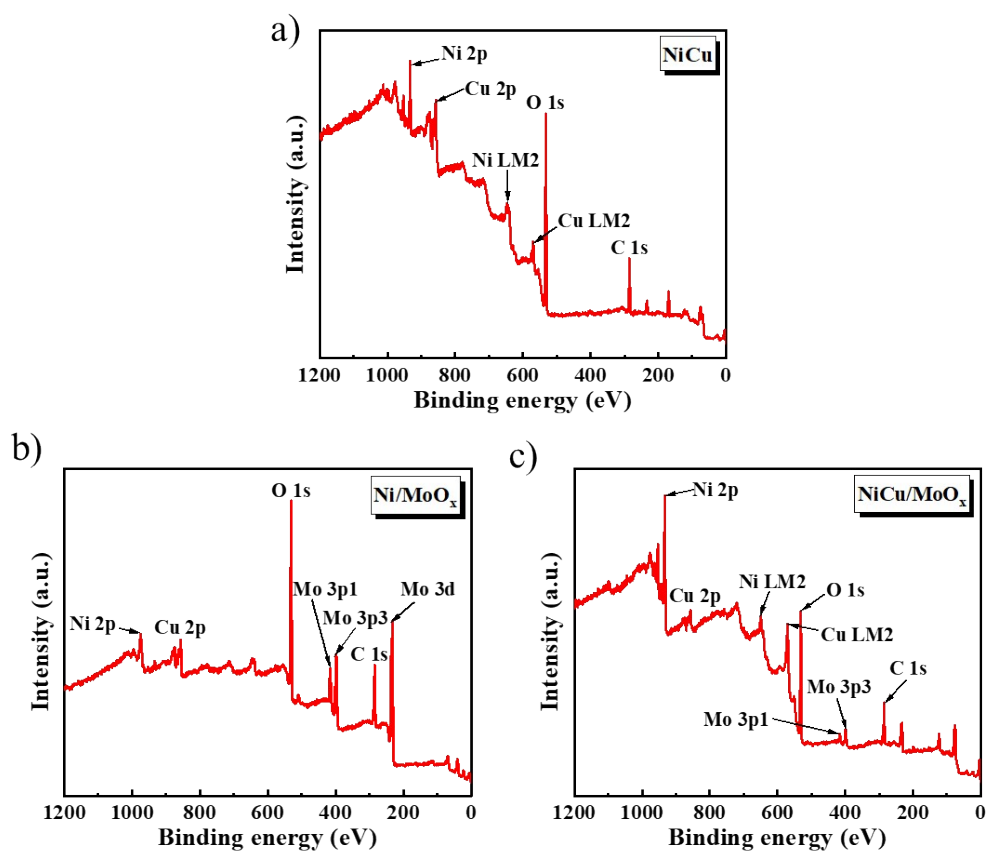

Figure S11. The XPS survey of (a) NiCu, (b) Ni/MoO<sub>x</sub> and (c) NiCu/MoO<sub>x</sub>.

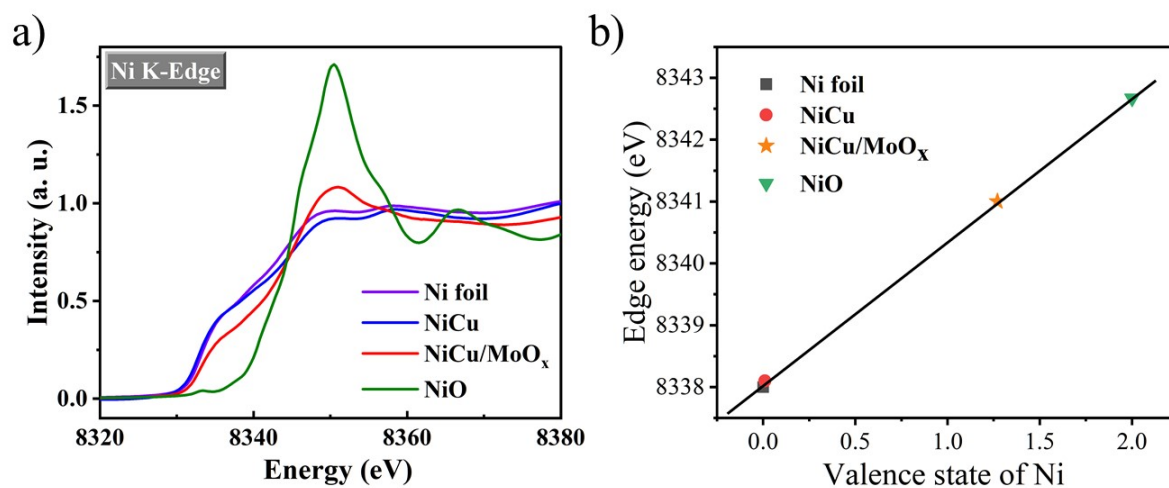

Figure S12. a) Ni K-edge XANES of NiCu, NiCu/MoO<sub>x</sub>, Ni foil and NiO; b) Corresponding accurate Ni value.

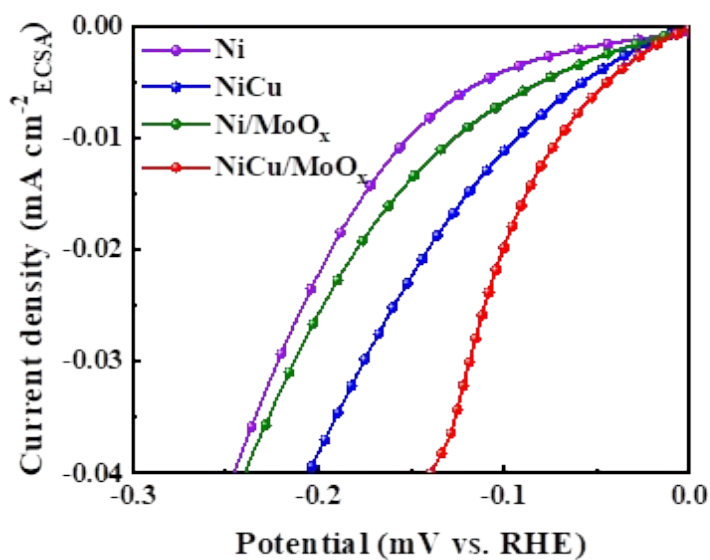

Figure S13. The ECSA-normalized LSV curves of the prepared Ni, NiCu, Ni/MoO<sub>x</sub> and NiCu/MoO<sub>x</sub> toward HER in 1M KOH.

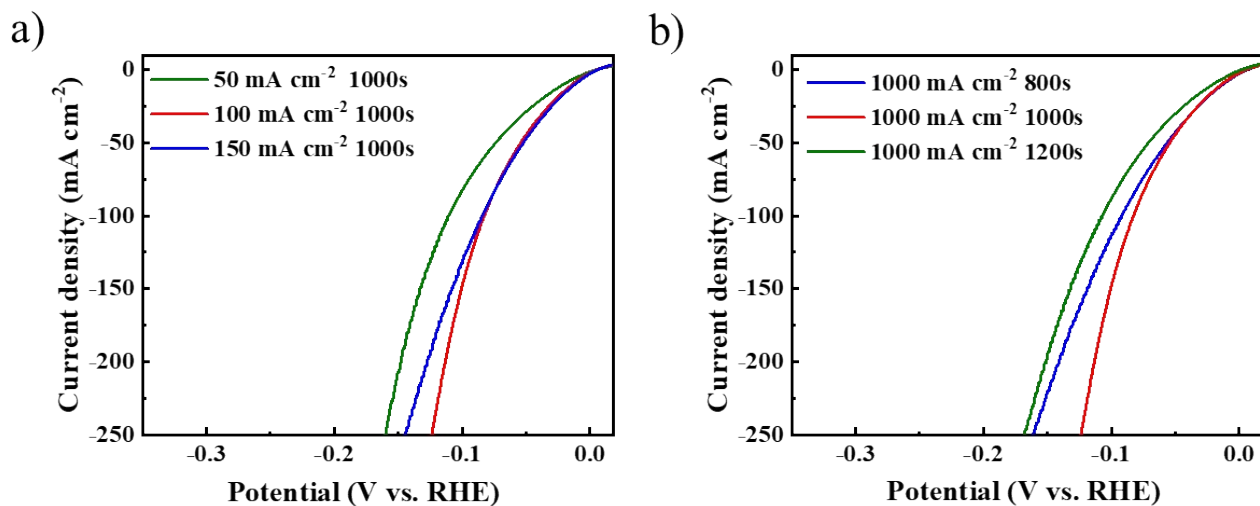

Figure S14. The LSV curves of NiCu/MoO<sub>x</sub> with different deposition currents and times for HER in 1M KOH.

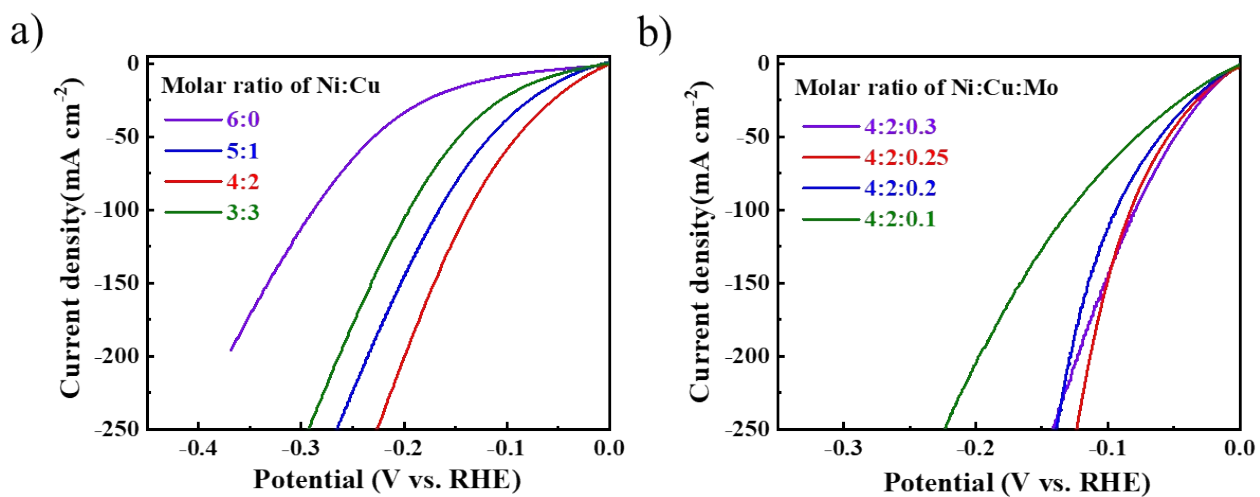

Figure S15. The LSV curves of different ratios of a) Ni/Cu and b) Ni/Cu/Mo toward HER with scan rates of 2 mV S<sup>-1</sup> in 1M KOH.



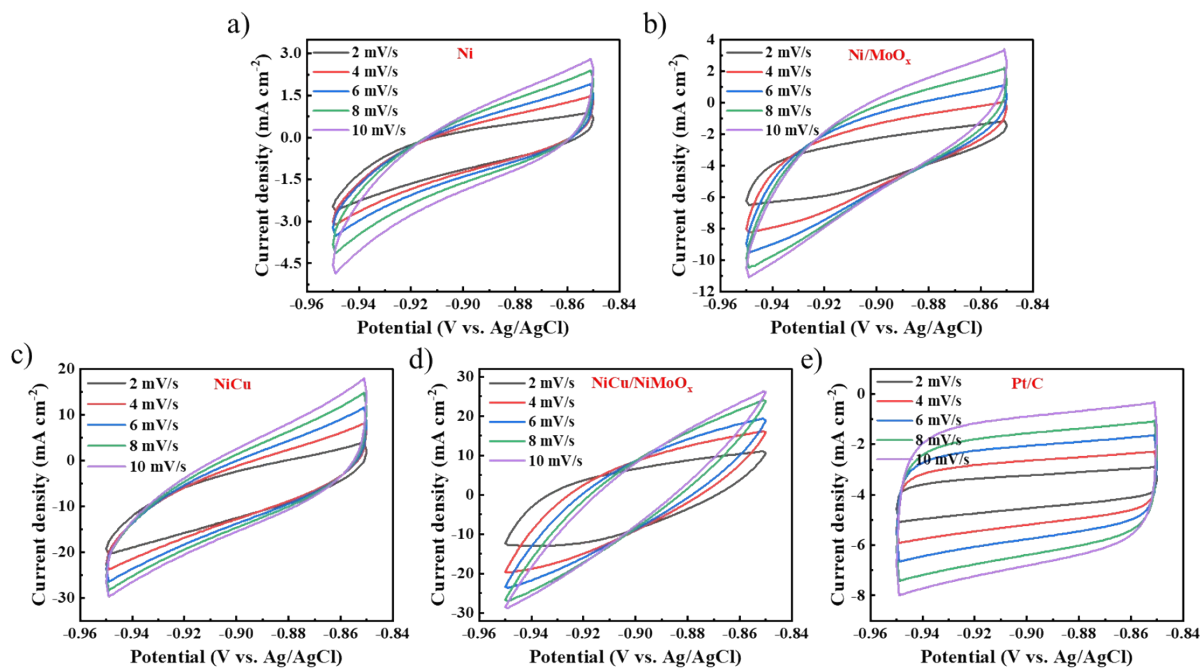

Figure S16. The cyclic voltammograms (CV) of (a) Ni, (b) Ni/MoO<sub>x</sub>, (c) NiCu, (d) NiCu/MoO<sub>x</sub>, (e) Pt/C with scan rates of 2-10 mV S<sup>-1</sup> in 1M KOH.

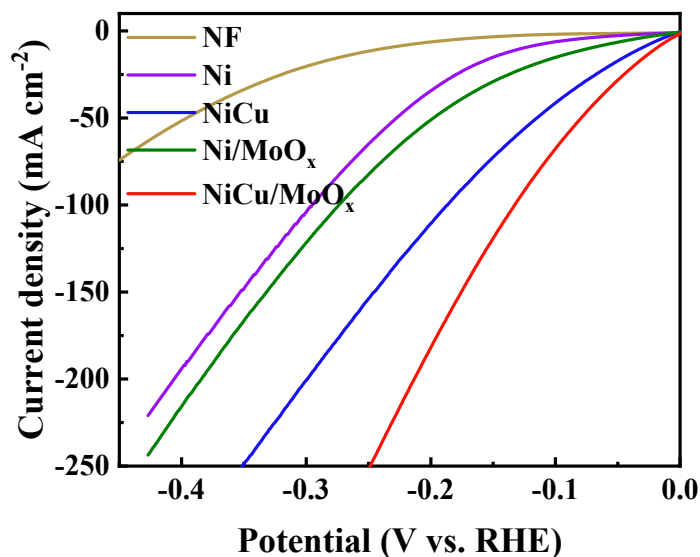

Figure S17. The LSV curves of the prepared NF, Ni, Ni/MoO<sub>x</sub>, NiCu, NiCu/MoO<sub>x</sub> without IR compensation with scan rates of 2 mV S<sup>-1</sup> in 1M KOH.

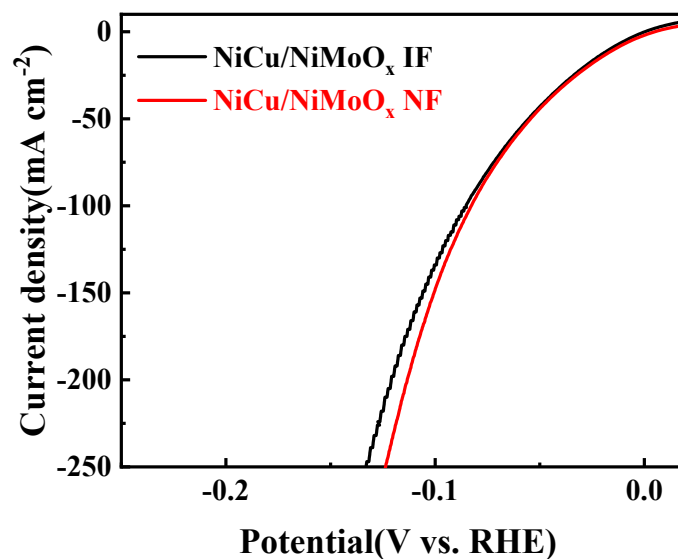

Figure S18. The LSV curves of loading NiCu/MoO<sub>x</sub> catalysts onto different substrates (nickel foam and iron foam).

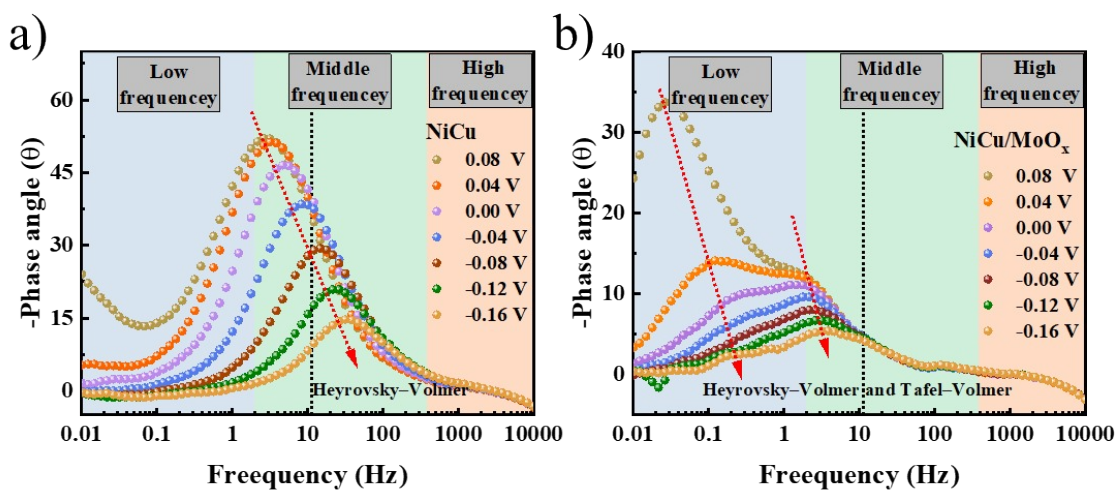

Figure S19. Bode plots for a) NiCu in 1 M KOH with Heyrovsky step as RDS, and b) NiCu/MoO<sub>x</sub> with mixture mechanisms (Heyrovsky–Volmer and Tafel–Volmer).

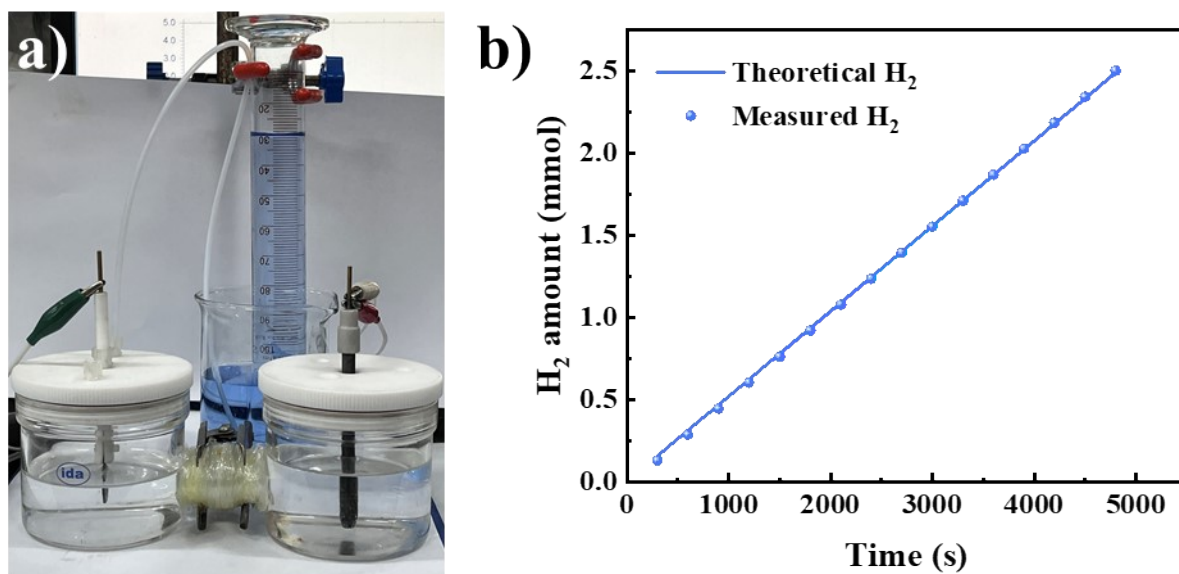

Figure S20. a) Physical picture of the device, b) The amount of H<sub>2</sub> collected by the water drainage method as a function of time for NiCu/MoO<sub>x</sub> under a constant current density of 100 mA cm<sup>-2</sup>.

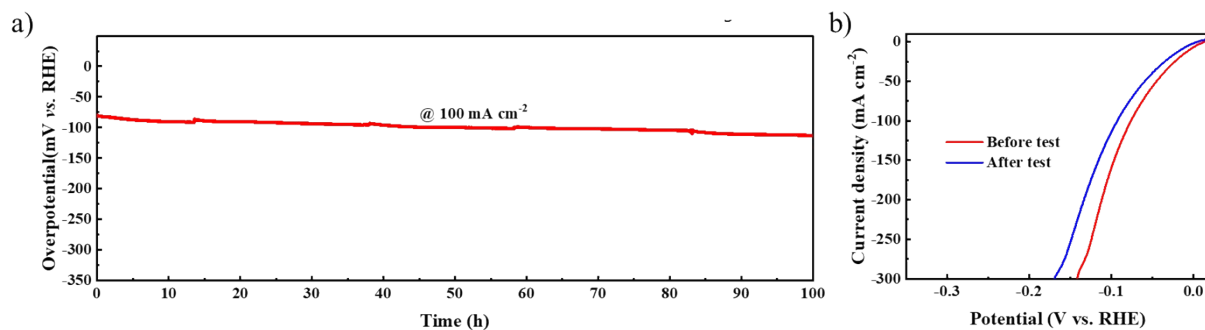

Figure S21. a) The chronopotentiometry (i-t) tests of the NiCu/MoO<sub>x</sub> electrode at 100 mA cm<sup>-2</sup>. b) The lsv before and after test.



Table S1. Ni, Cu and Mo atomic percentages obtained from ICP-OES results.

| Samples               | Chemical composition (mg/L) |      |      |
|-----------------------|-----------------------------|------|------|
|                       | Ni                          | Cu   | Mo   |
| NiCu                  | 1.26                        | 1.49 | /    |
| Ni/MoO <sub>x</sub>   | 1.23                        | /    | 0.46 |
| NiCu/MoO <sub>x</sub> | 1.41                        | 0.96 | 0.92 |

Table S2. Comparison of HER performance for NiCu/MoO<sub>x</sub> with other reported electrocatalysts in 1 M KOH.

| Catalysts                                       | Electrolyte | $\eta$ (mV)<br>$j=-10 \text{ mAcm}^{-2}$ | Tafel slope<br>(mV dec <sup>-1</sup> ) | References                                    |
|-------------------------------------------------|-------------|------------------------------------------|----------------------------------------|-----------------------------------------------|
| NiCu/MoO <sub>x</sub>                           | 1.0M KOH    | 14                                       | 38.3                                   | this work                                     |
| Pt/MgO                                          | 1.0M KOH    | 39                                       | 39                                     | Nat. Commun. 2022. 13, 2024[8]                |
| V-Ni <sub>2</sub> MoN <sub>3</sub>              | 1.0M KOH    | 54                                       | 42.8                                   | Electrochimica Acta 337(2020)135689[9]        |
| NiCo LDH/NF                                     | 1.0M KOH    | 51                                       | 70                                     | Adv. Funct. Mater. 28(2018)1704594[10]        |
| Mo-NiO/Ni                                       | 1.0M KOH    | 50                                       | 86                                     | ACS Energy Lett. 2019,4,3002-3010[11]         |
| Sr <sub>2</sub> RuO <sub>4</sub>                | 1.0M KOH    | 61                                       | 51                                     | Nat. Commun. 2019, 10, 149[12]                |
| P-Mo-Ni(OH) <sub>2</sub>                        | 1.0M KOH    | 22                                       | 80                                     | Appl. Catal. B-Environ. 260(2020)118154[13]   |
| Ni <sub>3</sub> N-V <sub>2</sub> O <sub>3</sub> | 1.0M KOH    | 57                                       | 50                                     | Appl. Catal. B-Environ. (2020).119590[14]     |
| Ru/Ni(OH) <sub>2</sub> /NF                      | 1.0M KOH    | 25                                       | 45                                     | J. Mater. Chem. A 2019,7, 11062-11068[15]     |
| Pt/NiRu-OH                                      | 1.0M KOH    | 38                                       | 39                                     | Appl. Catal. B-Environ. 2020, 269, 118824[16] |
| Ni <sub>5</sub> P <sub>4</sub> -Ru/CC           | 1.0M KOH    | 54                                       | 52                                     | Adv. Mater: 2020, 32, 1906972[17]             |
| RuCo@N-C                                        | 1.0M KOH    | 28                                       | 31                                     | Nat. Commun. 2017, 8, 14969[18]               |
| Ru@SC-CDs                                       | 1.0M KOH    | 29                                       | 57                                     | Nano Energy 2019, 65, 104023[19]              |
| NiFeRu-LDH                                      | 1.0M KOH    | 29                                       | 31                                     | Adv. Mater 2018, 30,                          |

|                                       |          |    |       |                                                  |
|---------------------------------------|----------|----|-------|--------------------------------------------------|
| Ru@NG-750                             | 1.0M KOH | 40 | 35.9  | 1706279[20]<br>ACS Catal. 2019, 9, 9897-9904[21] |
| Pt/Co(OH) <sub>2</sub>                | 1.0M KOH | 32 | 70    | ACS Catal. 2017, 7, 7131-7135[22]                |
| Vs-Co <sub>3</sub> S <sub>4</sub> @NF | 1.0M KOH | 46 | 66    | Appl. Catal. B-Environ. 322(2023)122104[23]      |
| ReS <sub>2</sub> /NiS                 | 1.0M KOH | 78 | 76    | Chemical Engineering Journal 451(2023)138905[24] |
| Ni(Cu)/NF                             | 1M KOH   | 27 | 33.3  | Small 2018, 14, 1704137[25]                      |
| Pt <sub>S</sub> A M-NiO/Ni            | 1M KOH   | 26 | 27.07 | Nat Commun 12, 3783 (2021).[26]                  |

## Reference

- [1] P. Hohenberg, W. Kohn, Inhomogeneous Electron Gas, *Physical Review* 136(3B) (1964) B864-B871.  
<https://doi.org/10.1103/PhysRev.136.B864>.
- [2] W. Kohn, L.J. Sham, Self-Consistent Equations Including Exchange and Correlation Effects, *Physical Review* 140(4A) (1965) A1133-A1138. <https://doi.org/10.1103/PhysRev.140.A1133>.
- [3] G. Kresse, J. Hafner, Ab initio molecular dynamics for liquid metals, *Physical Review B* 47(1) (1993) 558-561. <https://doi.org/10.1103/PhysRevB.47.558>.
- [4] P.E. Blöchl, Projector augmented-wave method, *Physical Review B* 50(24) (1994) 17953-17979.  
<https://doi.org/10.1103/PhysRevB.50.17953>.
- [5] J.P. Perdew, K. Burke, M. Ernzerhof, Generalized Gradient Approximation Made Simple, *Physical Review Letters* 77(18) (1996) 3865-3868. <https://doi.org/10.1103/PhysRevLett.77.3865>.
- [6] G. Kresse, J. Furthmüller, Efficient iterative schemes for ab initio total-energy calculations using a plane-wave basis set, *Physical Review B* 54(16) (1996) 11169-11186.  
<https://doi.org/10.1103/PhysRevB.54.11169>.
- [7] H.J. Monkhorst, J.D.J.P.r.B. Pack, Special points for Brillouin-zone integrations, 13(12) (1976) 5188.

- [8] H. Tan, B. Tang, Y. Lu, Q. Ji, L. Lv, H. Duan, N. Li, Y. Wang, F. Sihua, Z. Li, C. Wang, F. Hu, Z. Sun, W. Yan, Engineering a local acid-like environment in alkaline medium for efficient hydrogen evolution reaction, *Nature Communications* 13 (2022) 2024. <https://doi.org/10.1038/s41467-022-29710-w>.
- [9] P. Zhou, X. Lv, Y. Gao, Z. Liang, Y. Liu, Z. Wang, P. Wang, Z. Zheng, Y. Dai, B. Huang, Synthesis of novel cubic Ni<sub>2</sub>Mo<sub>3</sub>N and its electronic structure regulation by vanadium doping towards high-efficient HER electrocatalyst, *Electrochimica Acta* 337 (2020) 135689. <https://doi.org/10.1016/j.electacta.2020.135689>.
- [10] T. Tang, W.-J. Jiang, S. Niu, N. Liu, L. Hao, Q. Zhang, W. Wen, Y.-Y. Chen, L. Huang, F. Gao, J.-S. Hu, Kinetically Controlled Coprecipitation for General Fast Synthesis of Sandwiched Metal Hydroxide Nanosheets/Graphene Composites toward Efficient Water Splitting, *Advanced Functional Materials* 28 (2018). <https://doi.org/10.1002/adfm.201704594>.
- [11] J. Huang, J.C. Han, W. Tao, K. Feng, T. Yao, X.-J. Wang, S. Liu, J. Zhong, z. zhang, Y. Zhang, Boosting the Hydrogen Transfer during Volmer Reaction at Oxides/metal Nanocomposites for Efficient Alkaline Hydrogen Evolution, *ACS Energy Letters* XXXX (2019). <https://doi.org/10.1021/acsenergylett.9b02359>.
- [12] Y. Zhu, H. Tahini, Z. Hu, J. Dai, Y. Chen, H. Sun, W. Zhou, M. Liu, S. Smith, H. Wang, Z. Shao, Unusual synergistic effect in layered Ruddlesden–Popper oxide enables ultrafast hydrogen evolution, *Nature Communications* 10 (2019). <https://doi.org/10.1038/s41467-018-08117-6>.
- [13] W. Zhang, T. Yuanhao, L. Yu, X.-Y. Yu, Activating the Alkaline Hydrogen Evolution Performance of Mo-Incorporated Ni(OH)<sub>2</sub> by Plasma-Induced Heterostructure, *Applied Catalysis B: Environmental* 260 (2019) 118154. <https://doi.org/10.1016/j.apcatb.2019.118154>.
- [14] P. Zhou, G. Zhai, X. Lv, Y. Liu, Z. Wang, P. Wang, Z. Zheng, H. Cheng, Y. Dai, B. Huang, Boosting the electrocatalytic HER performance of Ni<sub>3</sub>N-V<sub>2</sub>O<sub>3</sub> via the interface coupling effect, *Applied Catalysis B:*



Environmental 283 (2021) 119590. <https://doi.org/10.1016/j.apcatb.2020.119590>.

[15] Q.-Q. Chen, X. Yang, C.-C. Hou, K. Li, Y. Chen, Inlay Ultrafine Ru Nanoparticles into Self-supported Ni(OH)<sub>2</sub> Nanoarray for Hydrogen Evolution with Low Overpotential and Enhanced Kinetics, Journal of Materials Chemistry A 7 (2019). <https://doi.org/10.1039/C9TA02451D>.

[16] X. Chen, Y. Lv, G. Zhang, Y. Huang, W. Liu, Y. Li, R. Chen, C. Nuckolls, H. Ni, An effective hybrid electrocatalyst for the alkaline HER: Highly dispersed Pt sites immobilized by a functionalized NiRu-hydroxide, Applied Catalysis B: Environmental 269 (2020) 118824. <https://doi.org/10.1016/j.apcatb.2020.118824>.

[17] Q. He, D. Tian, H. Jiang, D. Cao, S. Wei, D. Liu, P. Song, Y. Lin, L. Song, Achieving Efficient Alkaline Hydrogen Evolution Reaction over a Ni<sub>5</sub>P<sub>4</sub> Catalyst Incorporating Single-Atomic Ru Sites, Advanced Materials 32 (2020). <https://doi.org/10.1002/adma.201906972>.

[18] J. Su, Y. Yang, G. Xia, J. Chen, P. Jiang, Q. Chen, Ruthenium-Cobalt Nanoalloys Encapsulated in Nitrogen-Doped Graphene as Active Electrocatalysts for Producing Hydrogen in Alkaline Media, Nature Communications 8 (2017) 14969. <https://doi.org/10.1038/ncomms14969>.

[19] Y. Liu, Y. Yang, Z. Liu, Z. Chen, L. Shang, S. Lu, T. Zhang, Self-crosslinking carbon dots loaded ruthenium dots as an efficient and super-stable hydrogen production electrocatalyst at all pH values, Nano Energy 65 (2019) 104023. <https://doi.org/10.1016/j.nanoen.2019.104023>.

[20] G. Chen, T. Wang, J. Zhang, P. Liu, H. Sun, X. Zhuang, M. Chen, X. Feng, Accelerated Hydrogen Evolution Kinetics on NiFe-Layered Double Hydroxide Electrocatalysts by Tailoring Water Dissociation Active Sites, Advanced Materials 30 (2018). <https://doi.org/10.1002/adma.201706279>.

[21] L. Bai, Z. Duan, X. Wen, R. Si, Q. Zhang, J. Guan, Highly Dispersed Ruthenium-Based Multifunctional Electrocatalyst, ACS Catalysis 2019 (2019). <https://doi.org/10.1021/acscatal.9b03514>.

- [22] Z. Xing, C. Han, D. Wang, Q. Li, X. Yang, Ultrafine Pt Nanoparticle-Decorated Co(OH)<sub>2</sub> Nanosheet Arrays with Enhanced Catalytic Activity toward Hydrogen Evolution, *ACS Catalysis* 7 (2017) 7131-7135. <https://doi.org/10.1021/acscatal.7b01994>.
- [23] Q. Wang, H. Xu, X. Qian, G. He, H. Chen, Sulfur vacancies engineered self-supported Co<sub>3</sub>S<sub>4</sub> nanoflowers as an efficient bifunctional catalyst for electrochemical water splitting, *Applied Catalysis B: Environmental* 322 (2022) 122104. <https://doi.org/10.1016/j.apcatb.2022.122104>.
- [24] Y. Liu, H. Zhang, Y. Zhang, W. Song, Z. Hou, G. Zhou, Z. Zhang, J. Liu, In-situ Growth of ReS<sub>2</sub>/NiS Heterostructure on Ni Foam as an Ultra-stable Electrocatalyst for Alkaline Hydrogen Generation, *Chemical Engineering Journal* 451 (2022) 138905. <https://doi.org/10.1016/j.cej.2022.138905>.
- [25] Q.Q. Sun, Y.J. Dong, Z.L. Wang, S.W. Yin, C. Zhao, Synergistic Nanotubular Copper-Doped Nickel Catalysts for Hydrogen Evolution Reactions, *Small* 14(14) (2018) 1704137. <https://doi.org/10.1002/sml.201704137>.
- [26] K.L. Zhou, Z. Wang, C.B. Han, X. Ke, C. Wang, Y. Jin, Q. Zhang, J. Liu, H. Wang, H. Yan, Platinum single-atom catalyst coupled with transition metal/metal oxide heterostructure for accelerating alkaline hydrogen evolution reaction, *Nature Communications* 12(1) (2021) 3783. <https://doi.org/10.1038/s41467-021-24079-8>.
